# Supplementary material for: Restricting HIV-1 pathways for escape using rationally designed anti–HIV-1 antibodies
Source: PubMed Central journal article supplement — J Exp Med. 2013 Jun 3;210(6):1235–49. doi: 10.1084/jem.20130221 (PMC3674693; doi:10.1084/jem.20130221), 2013-06-03
Supplement: supp_jem.20130221_JEM_20130221_sm.pdf [file supp_jem.20130221_JEM_20130221_sm.pdf]

SUPPLEMENTAL MATERIAL

Diskin et al., <http://www.jem.org/cgi/content/full/jem.20130012/DC1>

Table S1 . IC<sub>50</sub> Values (µg/ml)

| Virus ID           | Clade*         | NIH45-46 | NIH45-46 <sup>G54W</sup> | 45-46m2 | 45-46m7 | 45-46m25 | 45-46m28 |
|--------------------|----------------|----------|--------------------------|---------|---------|----------|----------|
| T278-50            | CRF02_AG       | >50      | >50                      | >50     | >50     | >50      | >50      |
| 89-F1_2_25         | CD             | >50      | >50                      | >50     | >50     | >50      | >50      |
| 6540.v4.c1         | AC             | >50      | >50                      | >50     | >50     | >50      | 47.3     |
| Ce1172_H1          | C (T/F)        | >50      | >50                      | >50     | >50     | >50      | >50      |
| 620345.c01         | CRF01_AE       | >50      | >50                      | >50     | >50     | >50      | >50      |
| X2088_c9           | G              | >50      | >50                      | 44.345  | >50     | >50      | 23.7     |
| Du422.1            | C              | >50      | >50                      | 8.473   | 1.647   | 2.572    | 0.603    |
| 3817.v2.c59        | CD             | >50      | >50                      | 5.138   | >50     | >50      | >50      |
| CAP210.2.00.E8     | C              | >50      | >50                      | 1.945   | 14.4    | 24       | 11.2     |
| CAP45.2.00.G3      | C              | >50      | 32.25                    | 0.02    | 0.44    | 1.456    | 0.12     |
| 6545.v4.c1         | AC             | >50      | 18.92                    | 15.21   | 0.441   | 4.636    | 0.092    |
| 211-9              | CRF02_AG       | >50      | 16.41                    | 0.253   | 27.6    | 26.2     | 8.414    |
| Du172.17           | C              | >50      | 3.65                     | 0.015   | 0.979   | 3.548    | 0.546    |
| 3016.v5.c45        | D              | >50      | 1.47                     | 0.006   | 0.023   | 0.017    | 0.009    |
| T250-4             | CRF02_AG       | >50      | 1.33                     | 1.554   | 15.2    | 8.488    | 17.1     |
| 246F C1G           | C (T/F)        | >50      | 0.315                    | 0.036   | 0.067   | 0.054    | 0.033    |
| CNE20              | BC             | 7.83     | 0.04                     | 0.001   | 0.007   | 0.01     | 0.002    |
| CNE21              | BC             | 6.01     | 0.03                     | 0.001   | 0.013   | 0.016    | 0.009    |
| HIV-16845-2.22     | C              | 5        | 0.45                     | 0.38    | 0.181   | 0.305    | 0.213    |
| C2101.c01          | CRF01_AE       | 4.24     | 0.04                     | 0.044   | 0.038   | 0.051    | 0.041    |
| ZM247v1(Rev-)      | C (T/F)        | 2.94     | 0.32                     | 0.001   | 0.094   | 0.167    | 0.013    |
| ZM233M.PB6         | C              | 2.5      | 0.02                     | 0.011   | 0.025   | 0.043    | 0.024    |
| C1080.c03          | CRF01_AE       | 2.48     | 0.2                      | 0.154   | 0.211   | 0.357    | 0.325    |
| THRO4156.18        | B              | 1.91     | 0.54                     | 0.685   | 0.652   | 0.676    | 0.629    |
| 2103.v3.c10        | ACD            | 1.77     | 0.2                      | 0.181   | 0.429   | 0.49     | 0.298    |
| 231966.c02         | D              | 1.64     | 0.02                     | 0.012   | 0.018   | 0.016    | 0.013    |
| TRO.11             | B              | 1.61     | 0.04                     | 0.02    | 0.041   | 0.04     | 0.034    |
| T251-18            | CRF02_AG       | 1.35     | 0.26                     | 0.336   | 0.421   | 0.448    | 0.292    |
| Ce1176_A3          | C (T/F)        | 0.93     | 0.16                     | 0.172   | 0.291   | 0.316    | 0.241    |
| BJOX010000.06.2    | CRF01_AE (T/F) | 0.87     | 0.769                    | 1.382   | 1.137   | 1.133    | 0.758    |
| QH0692.42          | B              | 0.72     | 0.37                     | 0.216   | 0.404   | 0.352    | 0.283    |
| T255-34            | CRF02_AG       | 0.71     | 0.001                    | 0.013   | 0.042   | 0.047    | 0.034    |
| ZM135M.PL10a       | C              | 0.59     | 0.04                     | 0.049   | 0.075   | 0.094    | 0.045    |
| AC10.0.29          | B              | 0.56     | 0.13                     | 0.118   | 0.212   | 0.233    | 0.181    |
| T257-31            | CRF02_AG       | 0.49     | 0.13                     | 0.126   | 0.206   | 0.191    | 0.163    |
| 6240_08_TA5_4622   | B (T/F)        | 0.44     | 0.11                     | 0.173   | 0.235   | 0.211    | 0.163    |
| CNE58              | BC             | 0.43     | 0.02                     | 0.016   | 0.026   | 0.026    | 0.022    |
| Ce0393_C3          | C (T/F)        | 0.334    | 0.013                    | 0.046   | 0.036   | 0.035    | 0.031    |
| R1166.c01          | CRF01_AE       | 0.31     | 0.13                     | 0.278   | 0.292   | 0.297    | 0.151    |
| CNE30              | BC             | 0.309    | 0.052                    | 0.082   | 0.158   | 0.156    | 0.114    |
| 235-47             | CRF02_AG       | 0.3      | 0.001                    | 0.001   | 0.016   | 0.014    | 0.01     |
| CNE17              | BC             | 0.261    | 0.036                    | 0.064   | 0.096   | 0.096    | 0.065    |
| BJOX009000.02.4    | CRF01_AE       | 0.26     | 0.132                    | 0.14    | 0.288   | 0.272    | 0.202    |
| 928-28             | CRF02_AG       | 0.23     | 0.06                     | 0.045   | 0.139   | 0.145    | 0.093    |
| X2131_C1_B5        | G              | 0.23     | 0.05                     | 0.031   | 0.029   | 0.033    | 0.017    |
| 9004SS_A3_4        | A (T/F)        | 0.18     | 0.054                    | 0.046   | 0.083   | 0.074    | 0.074    |
| BJOX025000.01.1    | CRF01_AE (T/F) | 0.18     | 0.014                    | 0.031   | 0.059   | 0.146    | 0.098    |
| ZM53M.PB12         | C              | 0.175    | 0.04                     | 0.091   | 0.084   | 0.09     | 0.063    |
| ZM214M.PL15        | C              | 0.17     | 0.03                     | 0.036   | 0.038   | 0.102    | 0.054    |
| Ce703010054_2A2    | C (T/F)        | 0.159    | 0.027                    | 0.016   | 0.023   | 0.027    | 0.026    |
| CAAN5342.A2        | B              | 0.15     | 0.07                     | 0.078   | 0.072   | 0.072    | 0.046    |
| ZM197M.PB7         | C              | 0.15     | 0.04                     | 0.074   | 0.102   | 0.098    | 0.049    |
| Ce704809221_1B3    | C (T/F)        | 0.15     | 0.007                    | 0.101   | 0.092   | 0.099    | 0.069    |
| 7030102001E5(Rev-) | C (T/F)        | 0.14     | 0.042                    | 0.038   | 0.079   | 0.08     | 0.047    |
| 6535.3             | B              | 0.14     | 0.03                     | 0.015   | 0.135   | 0.148    | 0.094    |
| SC05_8C11_2344     | B (T/F)        | 0.14     | 0.021                    | 0.07    | 0.1     | 0.087    | 0.06     |
| Q23.17             | A              | 0.14     | 0.01                     | 0.015   | 0.033   | 0.034    | 0.028    |
| C4118.c09          | CRF01_AE       | 0.14     | 0.01                     | 0.011   | 0.025   | 0.03     | 0.021    |
| PVO.4              | B              | 0.12     | 0.05                     | 0.014   | 0.044   | 0.051    | 0.029    |
| 1054_07_TC4_1499   | B (T/F)        | 0.113    | 0.04                     | 0.104   | 0.052   | 0.108    | 0.087    |
| 191955_A11         | A (T/F)        | 0.11     | 0.015                    | 0.013   | 1.22    | 3.083    | 0.568    |
| Ce2010_F5          | C (T/F)        | 0.101    | 0.038                    | 0.03    | 0.098   | 0.092    | 0.062    |
| ZM109F.PB4         | C              | 0.095    | 0.002                    | 0.013   | 0.012   | 0.011    | 0.012    |

|                   |                |            |            |       |       |       |       |
|-------------------|----------------|------------|------------|-------|-------|-------|-------|
| 1056_10_TA11_1826 | B (T/F)        | 0.094      | 0.024      | 0.057 | 0.063 | 0.098 | 0.084 |
| MS208.A1          | A              | 0.09       | 0.031      | 0.022 | 0.041 | 0.04  | 0.028 |
| 191821_E6_1       | D (T/F)        | 0.09       | 0.013      | 0.05  | 0.062 | 0.076 | 0.064 |
| CNE5              | CRF01_AE       | 0.09       | 0.009      | 0.032 | 0.078 | 0.066 | 0.041 |
| 1394C9G1(Rev-)    | C (T/F)        | 0.09       | 0.001      | 0.012 | 0.011 | 0.012 | 0.005 |
| P1981_C5_3        | G              | 0.08       | 0.02       | 0.012 | 0.022 | 0.029 | 0.025 |
| Q461.e2           | A              | 0.076      | 0.009      | 0.034 | 0.055 | 0.057 | 0.045 |
| P0402_c2_11       | G              | 0.073      | 0.003      | 0.01  | 0.011 | 0.012 | 0.007 |
| 6244_13_B5_4576   | B (T/F)        | 0.07       | 0.005      | 0.03  | 0.033 | 0.035 | 0.019 |
| CNE19             | BC             | 0.07       | 0.002      | 0.022 | 0.019 | 0.019 | 0.017 |
| BJOX028000.10.3   | CRF01_AE (T/F) | 0.07       | 0.001      | 0.001 | 0.003 | 0.004 | 0.004 |
| X1632_S2_B10      | G              | 0.07       | Not Tested | 0.001 | 0.006 | 0.008 | 0.007 |
| BJOX015000.11.5   | CRF01_AE (T/F) | 0.06       | 0.048      | 0.039 | 0.061 | 0.095 | 0.076 |
| SC422661.8        | B              | 0.06       | 0.02       | 0.024 | 0.042 | 0.045 | 0.029 |
| 62357_14_D3_4589  | B (T/F)        | 0.06       | 0.02       | 0.015 | 0.085 | 0.177 | 0.087 |
| WITO4160.33       | B              | 0.06       | 0.01       | 0.015 | 0.023 | 0.038 | 0.027 |
| Ce2060_G9         | C (T/F)        | 0.058      | 0.005      | 0.014 | 0.028 | 0.035 | 0.02  |
| Ce0682_E4         | C (T/F)        | 0.054      | 0.01       | 0.007 | 0.021 | 0.026 | 0.018 |
| 231965.c01        | D              | 0.051      | 0.001      | 0.001 | 0.026 | 0.033 | 0.023 |
| 263-8             | CRF02_AG       | 0.05       | 0.001      | 0.018 | 0.027 | 0.029 | 0.028 |
| Q259.d2.17        | A              | 0.043      | 0.001      | 0.001 | 0.017 | 0.02  | 0.011 |
| Ce1086_B2         | C (T/F)        | 0.04       | 0.019      | 0.004 | 0.016 | 0.029 | 0.025 |
| TRJO4551.58       | B              | 0.04       | 0.01       | 0.004 | 0.023 | 0.02  | 0.015 |
| 249M B10          | C (T/F)        | 0.04       | 0.001      | 0.001 | 0.013 | 0.025 | 0.018 |
| 6811.v7.c18       | CD             | 0.035      | 0.001      | 0.026 | 0.044 | 0.043 | 0.038 |
| R2184.c04         | CRF01_AE       | 0.034      | 0.005      | 0.008 | 0.036 | 0.036 | 0.024 |
| 6480.v4.c25       | CD             | 0.032      | 0.004      | 0.016 | 0.015 | 0.013 | 0.01  |
| X1254_c3          | G              | 0.032      | 0.002      | 0.006 | 0.017 | 0.02  | 0.01  |
| Q842.d12          | A              | 0.031      | 0.005      | 0.001 | 0.011 | 0.013 | 0.01  |
| CNE52             | BC             | 0.03       | 0.01       | 0.004 | 0.011 | 0.011 | 0.012 |
| A07412M1.vrc12    | D              | 0.03       | 0.001      | 0.001 | 0.032 | 0.029 | 0.024 |
| 3365.v2.c2        | A              | 0.029      | 0.01       | 0.014 | 0.018 | 0.018 | 0.018 |
| C3347.c11         | CRF01_AE       | 0.029      | 0.001      | 0.007 | 0.031 | 0.037 | 0.024 |
| 1006_11_C3_1601   | B (T/F)        | 0.027      | 0.001      | 0.009 | 0.011 | 0.011 | 0.01  |
| 3415.v1.c1        | A              | 0.022      | 0.001      | 0.013 | 0.028 | 0.029 | 0.024 |
| X1193_c1          | G              | 0.021      | 0.001      | 0.008 | 0.02  | 0.021 | 0.02  |
| 6952.v1.c20       | CD             | 0.02       | 0.001      | 0.007 | 0.016 | 0.012 | 0.013 |
| Du156.12          | C              | 0.02       | 0.001      | 0.003 | 0.009 | 0.009 | 0.005 |
| HIV-16055-2.3     | C              | 0.02       | 0.001      | 0.002 | 0.006 | 0.006 | 0.004 |
| 191084 B7-19      | A (T/F)        | 0.02       | 0.001      | 0.001 | 0.021 | 0.022 | 0.019 |
| ZM249M.PL1        | C              | 0.017      | 0.002      | 0.001 | 0.013 | 0.016 | 0.009 |
| RHPA4259.7        | B              | 0.017      | 0.001      | 0.001 | 0.008 | 0.007 | 0.005 |
| REJO4541.67       | B              | 0.014      | 0.002      | 0.001 | 0.007 | 0.01  | 0.007 |
| 0815.v3.c3        | ACD            | 0.014      | 0.001      | 0.001 | 0.006 | 0.009 | 0.01  |
| HIV-0013095-2.11  | C              | 0.01       | 0.005      | 0.002 | 0.009 | 0.01  | 0.006 |
| BF1266.431a       | C (T/F)        | 0.01       | 0.001      | 0.002 | 0.004 | 0.007 | 0.003 |
| 1012_11_TC21_3257 | B (T/F)        | 0.01       | 0.001      | 0.001 | 0.008 | 0.009 | 0.005 |
| Q769.d22          | A              | 0.009      | 0.001      | 0.003 | 0.016 | 0.019 | 0.017 |
| 3301.v1.c24       | AC             | 0.009      | 0.001      | 0.001 | 0.008 | 0.009 | 0.007 |
| CNE53             | BC             | 0.008      | 0.001      | 0.006 | 0.008 | 0.009 | 0.006 |
| 6041.v3.c23       | AC             | 0.006      | 0.001      | 0.001 | 0.004 | 0.003 | 0.004 |
| WEAU_d15_410_787  | B (T/F)        | 0.005      | 0.001      | 0.008 | 0.007 | 0.007 | 0.006 |
| HIV-001428-2.42   | C              | 0.001      | 0.001      | 0.001 | 0.001 | 0.001 | 0.001 |
| 0260.v5.c36       | A              | Not Tested | 0.117      | 0.032 | 0.183 | 0.183 | 0.137 |
| CNE8              | CRF01_AE       | Not Tested | 0.055      | 0.038 | 0.096 | 0.08  | 0.068 |

| IC <sub>50</sub> values (µg/ml) | >50 | 10-50 | 1-10 | 0.1-1 | 0.01-0.1 | <0.01 |
|---------------------------------|-----|-------|------|-------|----------|-------|
|---------------------------------|-----|-------|------|-------|----------|-------|

Table S2. IC<sub>80</sub> Values (µg/ml)

| Virus ID           | Virus ID       | NIH45-46 | NIH45-46 <sup>GS4W</sup> | 45-46m2 | 45-46m7 | 45-46m25 | 45-46m28 |
|--------------------|----------------|----------|--------------------------|---------|---------|----------|----------|
| Ce1172_H1          | C (T/F)        | >50      | >50                      | >50     | >50     | >50      | >50      |
| 620345.c01         | CRF01_AE       | >50      | >50                      | >50     | >50     | >50      | >50      |
| X2088_c9           | G              | >50      | >50                      | >50     | >50     | >50      | >50      |
| T278-50            | CRF02_AG       | >50      | >50                      | >50     | >50     | >50      | >50      |
| 89-F1_2_25         | CD             | >50      | >50                      | >50     | >50     | >50      | >50      |
| 6540.v4.c1         | AC             | >50      | >50                      | >50     | >50     | >50      | >50      |
| 6545.v4.c1         | AC             | >50      | >50                      | >50     | 18.2    | 45.3     | 4.532    |
| Du422.1            | C              | >50      | >50                      | >50     | 10.7    | 19.9     | 4.841    |
| 3817.v2.c59        | CD             | >50      | >50                      | >50     | >50     | >50      | >50      |
| CAP210.2.00.E8     | C              | >50      | >50                      | 9.052   | >50     | >50      | >50      |
| 211-9              | CRF02_AG       | >50      | >50                      | 0.898   | >50     | >50      | >50      |
| CAP45.2.00.G3      | C              | >50      | >50                      | 0.089   | 6.308   | 11.2     | 1.274    |
| T250-4             | CRF02_AG       | >50      | 44.94                    | 38.902  | >50     | >50      | >50      |
| Du172.17           | C              | >50      | 42.85                    | 0.125   | 7.854   | 24.1     | 5.092    |
| 3016.v5.c45        | D              | >50      | 15.37                    | 0.037   | 0.076   | 0.068    | 0.065    |
| 246F C1G           | C (T/F)        | >50      | 2.446                    | 0.14    | 0.275   | 0.225    | 0.203    |
| CNE20              | BC             | >50      | 0.48                     | 0.02    | 0.057   | 0.079    | 0.027    |
| BJOX028000.10.3    | CRF01_AE (T/F) | >50      | 0.002                    | 0.006   | 0.016   | 0.019    | 0.021    |
| X1632_S2_B10       | G              | >50      | Not Tested               | 0.007   | 0.037   | 0.041    | 0.033    |
| CNE21              | BC             | 38.07    | 0.16                     | 0.047   | 0.066   | 0.078    | 0.063    |
| C2101.c01          | CRF01_AE       | 31.37    | 0.17                     | 0.169   | 0.253   | 0.346    | 0.33     |
| ZM247v1(Rev-)      | C (T/F)        | 24.5     | 2.6                      | 0.034   | 0.527   | 0.907    | 0.115    |
| HIV-16845-2.22     | C              | 22.61    | 2.1                      | 1.44    | 1.074   | 1.582    | 1.211    |
| ZM233M.PB6         | C              | 14.18    | 0.11                     | 0.083   | 0.129   | 0.167    | 0.141    |
| C1080.c03          | CRF01_AE       | 11.56    | 0.91                     | 0.589   | 1.166   | 1.233    | 1.541    |
| BJOX025000.01.1    | CRF01_AE (T/F) | 10       | 0.135                    | 0.211   | 0.422   | 0.69     | 0.336    |
| 231966.c02         | D              | 9.64     | 0.11                     | 0.076   | 0.077   | 0.088    | 0.062    |
| THRO4156.18        | B              | 8.22     | 1.81                     | 2.736   | 3.263   | 3.271    | 4.789    |
| TRO.11             | B              | 7.49     | 0.13                     | 0.079   | 0.156   | 0.153    | 0.13     |
| BJOX010000.06.2    | CRF01_AE (T/F) | 6.37     | 4.499                    | 5.037   | 4.897   | 4.963    | 4.009    |
| 3103.v3.c10        | ACD            | 6.15     | 0.56                     | 0.594   | 1.125   | 1.305    | 0.907    |
| T251-18            | CRF02_AG       | 3.68     | 0.92                     | 1.426   | 1.526   | 1.616    | 1.1      |
| T255-34            | CRF02_AG       | 3.442    | 0.099                    | 0.105   | 0.274   | 0.282    | 0.243    |
| Ce1176_A3          | C (T/F)        | 3.17     | 0.45                     | 0.467   | 1.338   | 1.429    | 1.13     |
| ZM135M.PL10a       | C              | 2.79     | 0.16                     | 0.163   | 0.261   | 0.311    | 0.216    |
| CNE58              | BC             | 2.08     | 0.05                     | 0.042   | 0.095   | 0.093    | 0.068    |
| AC10.0.29          | B              | 1.93     | 0.63                     | 0.554   | 0.932   | 0.773    | 0.489    |
| QH0692.42          | B              | 1.71     | 1.12                     | 0.622   | 1.586   | 1.834    | 1.285    |
| 6240_08_TA5_4622   | B (T/F)        | 1.55     | 0.603                    | 0.623   | 1.136   | 0.75     | 0.613    |
| 235-47             | CRF02_AG       | 1.49     | 0.017                    | 0.019   | 0.061   | 0.045    | 0.037    |
| T257-31            | CRF02_AG       | 1.38     | 0.45                     | 0.471   | 0.684   | 0.639    | 0.579    |
| R1166.c01          | CRF01_AE       | 1.21     | 0.51                     | 1.01    | 1.044   | 1.086    | 0.842    |
| BJOX009000.02.4    | CRF01_AE       | 1.16     | 0.564                    | 0.621   | 0.949   | 0.909    | 0.911    |
| CNE30              | BC             | 1.067    | 0.196                    | 0.239   | 0.43    | 0.422    | 0.419    |
| Ce0393_C3          | C (T/F)        | 0.936    | 0.089                    | 0.151   | 0.183   | 0.164    | 0.153    |
| C4118.c09          | CRF01_AE       | 0.91     | 0.087                    | 0.058   | 0.154   | 0.129    | 0.136    |
| X2131_C1_B5        | G              | 0.88     | 0.24                     | 0.145   | 0.121   | 0.148    | 0.093    |
| Ce704809221_1B3    | C (T/F)        | 0.88     | 0.21                     | 0.484   | 0.421   | 0.343    | 0.269    |
| CNE17              | BC             | 0.734    | 0.127                    | 0.254   | 0.427   | 0.333    | 0.238    |
| 9004SS_A3_4        | A (T/F)        | 0.65     | 0.28                     | 0.138   | 0.292   | 0.266    | 0.265    |
| 928-28             | CRF02_AG       | 0.64     | 0.25                     | 0.159   | 0.49    | 0.41     | 0.369    |
| 7030102001E5(Rev-) | C (T/F)        | 0.63     | 0.228                    | 0.229   | 0.301   | 0.389    | 0.248    |
| ZM53M.PB12         | C              | 0.61     | 0.16                     | 0.257   | 0.299   | 0.319    | 0.241    |
| MS208.A1           | A              | 0.6      | 0.17                     | 0.089   | 0.188   | 0.181    | 0.127    |
| ZM214M.PL15        | C              | 0.59     | 0.15                     | 0.258   | 0.394   | 0.643    | 0.671    |
| ZM197M.PB7         | C              | 0.55     | 0.18                     | 0.274   | 0.368   | 0.346    | 0.23     |
| 6535.3             | B              | 0.54     | 0.13                     | 0.059   | 0.375   | 0.402    | 0.28     |
| Ce703010054_2A2    | C (T/F)        | 0.538    | 0.077                    | 0.051   | 0.144   | 0.164    | 0.118    |
| Q23.17             | A              | 0.5      | 0.03                     | 0.05    | 0.094   | 0.099    | 0.084    |
| 191821_E6_1        | D (T/F)        | 0.46     | 0.099                    | 0.13    | 0.223   | 0.218    | 0.232    |
| 1056_10_TA11_1826  | B (T/F)        | 0.447    | 0.16                     | 0.289   | 0.598   | 0.569    | 0.524    |
| ZM109F.PB4         | C              | 0.437    | 0.07                     | 0.086   | 0.099   | 0.091    | 0.063    |
| 191955_A11         | A (T/F)        | 0.43     | 0.076                    | 0.046   | 9.265   | >10      | 4.935    |
| PVO.4              | B              | 0.41     | 0.16                     | 0.099   | 0.156   | 0.17     | 0.136    |
| CNE5               | CRF01_AE       | 0.41     | 0.116                    | 0.137   | 0.233   | 0.309    | 0.204    |

|                   |                |            |       |       |       |       |       |
|-------------------|----------------|------------|-------|-------|-------|-------|-------|
| 1054_07_TC4_1499  | B (T/F)        | 0.404      | 0.165 | 0.515 | 0.518 | 1.095 | 0.869 |
| CAAN5342.A2       | B              | 0.4        | 0.21  | 0.299 | 0.493 | 0.447 | 0.333 |
| BJOX015000.11.5   | CRF01_AE (T/F) | 0.38       | 0.239 | 0.308 | 0.414 | 0.608 | 0.346 |
| SC05_8C11_2344    | B (T/F)        | 0.38       | 0.2   | 0.219 | 0.278 | 0.301 | 0.234 |
| 1394C9G1(Rev-)    | C (T/F)        | 0.38       | 0.024 | 0.055 | 0.065 | 0.07  | 0.039 |
| CNE19             | BC             | 0.37       | 0.028 | 0.102 | 0.061 | 0.073 | 0.054 |
| Ce2010_F5         | C (T/F)        | 0.357      | 0.187 | 0.133 | 0.458 | 0.618 | 0.424 |
| Q461.e2           | A              | 0.291      | 0.091 | 0.134 | 0.253 | 0.203 | 0.212 |
| Ce2060_G9         | C (T/F)        | 0.29       | 0.042 | 0.062 | 0.097 | 0.133 | 0.081 |
| Ce1086_B2         | C (T/F)        | 0.28       | 0.091 | 0.042 | 0.125 | 0.197 | 0.128 |
| 6244_13_B5_4576   | B (T/F)        | 0.26       | 0.095 | 0.109 | 0.156 | 0.166 | 0.103 |
| WITO4160.33       | B              | 0.26       | 0.04  | 0.073 | 0.151 | 0.227 | 0.166 |
| P1981_C5_3        | G              | 0.24       | 0.07  | 0.045 | 0.079 | 0.103 | 0.091 |
| P0402_c2_11       | G              | 0.214      | 0.023 | 0.042 | 0.066 | 0.054 | 0.031 |
| 1006_11_C3_1601   | B (T/F)        | 0.196      | 0.008 | 0.037 | 0.049 | 0.054 | 0.052 |
| 62357_14_D3_4589  | B (T/F)        | 0.19       | 0.07  | 0.084 | 0.63  | 1.438 | 0.681 |
| 249M B10          | C (T/F)        | 0.17       | 0.019 | 0.017 | 0.145 | 0.107 | 0.062 |
| Ce0682_E4         | C (T/F)        | 0.155      | 0.039 | 0.031 | 0.078 | 0.094 | 0.084 |
| Q259.d2.17        | A              | 0.154      | 0.014 | 0.011 | 0.083 | 0.1   | 0.042 |
| SC422661.8        | B              | 0.13       | 0.07  | 0.09  | 0.188 | 0.196 | 0.138 |
| TRJO4551.58       | B              | 0.13       | 0.05  | 0.02  | 0.076 | 0.067 | 0.052 |
| A07412M1.vrc12    | D              | 0.13       | 0.042 | 0.064 | 0.146 | 0.136 | 0.122 |
| R2184.c04         | CRF01_AE       | 0.127      | 0.036 | 0.039 | 0.131 | 0.102 | 0.097 |
| 231965.c01        | D              | 0.126      | 0.035 | 0.035 | 0.091 | 0.11  | 0.111 |
| CNE52             | BC             | 0.12       | 0.052 | 0.028 | 0.05  | 0.05  | 0.043 |
| 6811.v7.c18       | CD             | 0.113      | 0.033 | 0.11  | 0.198 | 0.145 | 0.132 |
| 3365.v2.c2        | A              | 0.11       | 0.056 | 0.049 | 0.079 | 0.062 | 0.083 |
| X1254_c3          | G              | 0.107      | 0.018 | 0.03  | 0.052 | 0.05  | 0.035 |
| 263-8             | CRF02_AG       | 0.1        | 0.025 | 0.067 | 0.133 | 0.105 | 0.089 |
| 6480.v4.c25       | CD             | 0.1        | 0.021 | 0.058 | 0.056 | 0.063 | 0.048 |
| C3347.c11         | CRF01_AE       | 0.094      | 0.028 | 0.034 | 0.194 | 0.157 | 0.102 |
| 3415.v1.c1        | A              | 0.086      | 0.023 | 0.054 | 0.098 | 0.103 | 0.07  |
| Q842.d12          | A              | 0.073      | 0.025 | 0.017 | 0.049 | 0.043 | 0.045 |
| 191084 B7-19      | A (T/F)        | 0.07       | 0.026 | 0.016 | 0.057 | 0.06  | 0.055 |
| 6952.v1.c20       | CD             | 0.07       | 0.01  | 0.042 | 0.078 | 0.061 | 0.066 |
| X1193_c1          | G              | 0.064      | 0.009 | 0.054 | 0.124 | 0.093 | 0.123 |
| HIV-16055-2.3     | C              | 0.06       | 0.024 | 0.017 | 0.03  | 0.023 | 0.015 |
| Du156.12          | C              | 0.054      | 0.005 | 0.024 | 0.03  | 0.03  | 0.024 |
| ZM249M.PL1        | C              | 0.053      | 0.007 | 0.017 | 0.084 | 0.075 | 0.07  |
| 0815.v3.c3        | ACD            | 0.052      | 0.003 | 0.004 | 0.03  | 0.042 | 0.044 |
| RHPA4259.7        | B              | 0.047      | 0.007 | 0.007 | 0.036 | 0.027 | 0.028 |
| 1012_11_TC21_3257 | B (T/F)        | 0.04       | 0.003 | 0.008 | 0.047 | 0.054 | 0.031 |
| 6041.v3.c23       | AC             | 0.04       | 0.001 | 0.003 | 0.022 | 0.018 | 0.015 |
| CNE53             | BC             | 0.039      | 0.005 | 0.039 | 0.03  | 0.026 | 0.031 |
| REJO4541.67       | B              | 0.035      | 0.013 | 0.01  | 0.036 | 0.044 | 0.034 |
| Q769.d22          | A              | 0.033      | 0.009 | 0.017 | 0.059 | 0.056 | 0.059 |
| 3301.v1.c24       | AC             | 0.033      | 0.004 | 0.006 | 0.036 | 0.031 | 0.026 |
| HIV-0013095-2.11  | C              | 0.03       | 0.027 | 0.017 | 0.036 | 0.037 | 0.033 |
| BF1266.431a       | C (T/F)        | 0.03       | 0.001 | 0.013 | 0.034 | 0.04  | 0.028 |
| WEAU_d15_410_787  | B (T/F)        | 0.015      | 0.003 | 0.027 | 0.031 | 0.034 | 0.028 |
| HIV-001428-2.42   | C              | 0.01       | 0.001 | 0.002 | 0.005 | 0.006 | 0.005 |
| 0260.v5.c36       | A              | Not Tested | 0.399 | 0.084 | 0.633 | 0.631 | 0.504 |
| CNE8              | CRF01_AE       | Not Tested | 0.24  | 0.156 | 0.421 | 0.285 | 0.347 |

| IC <sub>80</sub> values (µg/ml) | >50 | 10-50 | 1-10 | 0.1-1 | 0.01-0.1 | <0.01 |
|---------------------------------|-----|-------|------|-------|----------|-------|
|---------------------------------|-----|-------|------|-------|----------|-------|

Table S3. Crystallographic data collection and refinement statistics

| 45-46m2/93TH057                                     |                                               |
|-----------------------------------------------------|-----------------------------------------------|
| <b>Data collection</b>                              |                                               |
| Wavelength (Å)                                      | 0.953                                         |
| Space group                                         | P2 <sub>1</sub> 2 <sub>1</sub> 2 <sub>1</sub> |
| Cell dimensions                                     |                                               |
| <i>a</i> , <i>b</i> , <i>c</i> (Å)                  | 69.3, 70.5, 232.2                             |
| $\alpha$ , $\beta$ , $\gamma$ (°)                   | 90.0, 90.0, 90.0                              |
| Resolution (Å)                                      | 34.85-2.82 (2.89-2.82)                        |
| <i>R</i> <sub>meas</sub> (%)                        | 9.9 (96.8)                                    |
| <i>R</i> <sub>merged-<i>F</i></sub> (%)             | 14.4 (99.0)                                   |
| CC <sub>1/2</sub> <sup>†</sup>                      | 99.7 (73.6)                                   |
| <i>I</i> / $\sigma$ <i>I</i>                        | 11.0 (2.1)                                    |
| Completeness (%)                                    | 98.4 (99.3)                                   |
| Multiplicity                                        | 3.8                                           |
| Reflections                                         | 106875                                        |
| Unique reflections                                  | 27846                                         |
| <b>Refinement</b>                                   |                                               |
| Resolution (Å)                                      | 34.85-2.82                                    |
| No. reflections                                     | 27841                                         |
| <i>R</i> <sub>work</sub> / <i>R</i> <sub>free</sub> | 19.3 / 23.1                                   |
| No. atoms                                           |                                               |
| Protein                                             | 5998                                          |
| Carbohydrates                                       | 242                                           |
| Water                                               | 23                                            |
| <i>B</i> -factors                                   |                                               |
| Protein                                             | 76.3                                          |
| Carbohydrates                                       | 115                                           |
| Water                                               | 51                                            |
| <b>Ramachandran</b>                                 |                                               |
| Favored (%)                                         | 95.63                                         |
| Allowed (%)                                         | 4.1                                           |
| Outlier (%)                                         | 0.26                                          |
| r.m.s. deviations                                   |                                               |
| Bond lengths (Å)                                    | 0.007                                         |
| Bond angles (°)                                     | 1.027                                         |

5% of unique reflections were removed as a test set for the *R*<sub>free</sub> calculation.

Values in parentheses are for the highest resolution shell (2.89-2.82 Å).

<sup>†</sup> Correlation coefficients between two halves of the data set (CC<sub>1/2</sub> values) (Karplus,

P.A., and K. Diederichs. 2012. Linking crystallographic model and data quality.

*Science* 336:1030-1033) were calculated using XSCALE (Kabsch, W. 2010.

Integration, scaling, space-group assignment and post-refinement. *Acta Crystallogr D*

*Biol Crystallogr* 66:133-144).

Table S4. Neutralization IC<sub>50</sub> and IC<sub>80</sub> values of protein mixtures (µg/ml of each antibody) against a panel of 118 HIV-1 strains

| Virus              | Clade          | 45-46m2          |                  | 45-46m2<br>45-46m7 |                  | 45-46m2<br>45-46m7<br>PG9 |                  | 45-46m2<br>45-46m7<br>10-1074 |                  |
|--------------------|----------------|------------------|------------------|--------------------|------------------|---------------------------|------------------|-------------------------------|------------------|
|                    |                | IC <sub>50</sub> | IC <sub>80</sub> | IC <sub>50</sub>   | IC <sub>80</sub> | IC <sub>50</sub>          | IC <sub>80</sub> | IC <sub>50</sub>              | IC <sub>80</sub> |
| T278-50            | CRF02_AG       | >50              | >50              | >50                | >50              | 9.359                     | >50              | 4.598                         | 49.546           |
| 89-F1_2_25         | CD             | >50              | >50              | >50                | >50              | 1.881                     | >50              | >50                           | >50              |
| 6540.v4.c1         | AC             | >50              | >50              | >50                | >50              | 0.204                     | 1.004            | >50                           | >50              |
| Ce1172_H1          | C (T/F)        | >50              | >50              | >50                | >50              | 0.148                     | 0.548            | 0.023                         | 0.070            |
| 620345.c01         | CRF01_AE       | >50              | >50              | >50                | >50              | >50                       | >50              | >50                           | >50              |
| X2088_c9           | G              | >50              | >50              | >50                | >50              | 45.092                    | >50              | <0.001                        | 0.006            |
| 6545.v4.c1         | AC             | 9.214            | >50              | 7.283              | >50              | 0.106                     | 0.424            | 1.358                         | 17.389           |
| Du422.1            | C              | 3.837            | 23.071           | 15.614             | >50              | 0.144                     | 0.677            | 0.015                         | 0.044            |
| CAP210.2.00.E8     | C              | 1.866            | 8.872            | 2.729              | 14.238           | 0.212                     | 0.735            | 1.601                         | 7.407            |
| T250-4             | CRF02_AG       | 1.512            | 22.836           | 5.608              | >50              | 0.006                     | 0.023            | <0.001                        | 0.002            |
| THRO4156.18        | B              | 0.762            | 2.016            | 0.496              | 1.650            | 0.384                     | 1.245            | 0.346                         | 1.525            |
| 3817.v2.c59        | CD             | 0.759            | 4.004            | 1.599              | 18.438           | 0.007                     | 0.030            | 0.178                         | 0.659            |
| BJOX010000.06.2    | CRF01_AE (T/F) | 0.692            | 2.574            | 0.302              | 2.539            | 0.135                     | 1.176            | 0.352                         | 1.304            |
| R1166.c01          | CRF01_AE       | 0.588            | 2.314            | 0.241              | 0.773            | 0.105                     | 0.268            | 0.085                         | 0.279            |
| T251-18            | CRF02_AG       | 0.394            | 1.346            | 0.269              | 0.738            | 0.205                     | 0.570            | 0.090                         | 0.263            |
| 211-9              | CRF02_AG       | 0.351            | 2.239            | 0.438              | 2.894            | 0.166                     | 0.489            | 0.063                         | 0.157            |
| HIV-16845-2.22     | C              | 0.335            | 1.568            | 0.261              | 1.200            | 0.160                     | 0.570            | 0.071                         | 0.344            |
| 3103.v3.c10        | ACD            | 0.306            | 0.767            | 0.170              | 0.445            | 0.114                     | 0.303            | 0.006                         | 0.014            |
| 6240_08_TA5_4622   | B (T/F)        | 0.282            | 0.814            | 0.113              | 0.374            | 0.065                     | 0.232            | 0.010                         | 0.043            |
| BJOX009000.02.4    | CRF01_AE       | 0.256            | 0.872            | 0.123              | 0.581            | 0.126                     | 0.452            | 0.084                         | 0.314            |
| C1080.c03          | CRF01_AE       | 0.245            | 0.854            | 0.109              | 0.523            | 0.005                     | 0.017            | 0.115                         | 0.425            |
| QH0692.42          | B              | 0.211            | 1.031            | 0.126              | 0.610            | 0.084                     | 0.435            | 0.028                         | 0.113            |
| X2131_C1_B5        | G              | 0.177            | 1.584            | 0.013              | 0.078            | 0.006                     | 0.049            | 0.003                         | 0.017            |
| Ce1176_A3          | C (T/F)        | 0.169            | 0.460            | 0.079              | 0.233            | 0.013                     | 0.040            | 0.009                         | 0.031            |
| AC10.0.29          | B              | 0.154            | 0.520            | 0.066              | 0.317            | 0.030                     | 0.137            | 0.009                         | 0.031            |
| T257-31            | CRF02_AG       | 0.135            | 0.496            | 0.069              | 0.254            | 0.028                     | 0.109            | 0.038                         | 0.156            |
| 1054_07_TC4_1499   | B (T/F)        | 0.130            | 0.376            | 0.050              | 0.182            | 0.033                     | 0.122            | 0.027                         | 0.080            |
| ZM214M.PL15        | C              | 0.096            | 0.442            | 0.029              | 0.137            | 0.018                     | 0.085            | 0.014                         | 0.052            |
| CAANS342.A2        | B              | 0.087            | 0.241            | 0.054              | 0.193            | 0.039                     | 0.141            | 0.004                         | 0.013            |
| Ce704809221_1B3    | C (T/F)        | 0.083            | 0.497            | 0.046              | 0.227            | 0.011                     | 0.081            | 0.011                         | 0.080            |
| SC05_8C11_2344     | B (T/F)        | 0.080            | 0.195            | 0.030              | 0.106            | 0.020                     | 0.062            | 0.006                         | 0.026            |
| 7030102001E5(Rev-) | C (T/F)        | 0.080            | 0.380            | 0.045              | 0.158            | 0.036                     | 0.127            | 0.002                         | 0.009            |
| BJOX025000.01.1    | CRF01_AE (T/F) | 0.073            | 0.201            | 0.033              | 0.123            | 0.020                     | 0.080            | 0.046                         | 0.133            |
| CNE30              | BC             | 0.072            | 0.322            | 0.055              | 0.229            | 0.033                     | 0.142            | 0.029                         | 0.096            |
| BJOX015000.11.5    | CRF01_AE (T/F) | 0.069            | 0.402            | 0.023              | 0.225            | 0.011                     | 0.122            | 0.018                         | 0.093            |
| 0260.v5.c36        | A              | 0.067            | 0.263            | 0.047              | 0.188            | 0.034                     | 0.144            | 0.022                         | 0.074            |
| Q461.e2            | A              | 0.065            | 0.246            | 0.035              | 0.145            | 0.027                     | 0.095            | 0.019                         | 0.084            |
| ZM53M.PB12         | C              | 0.057            | 0.220            | 0.024              | 0.105            | 0.010                     | 0.049            | 0.018                         | 0.089            |
| Du172.17           | C              | 0.056            | 0.295            | 0.028              | 0.091            | 0.038                     | 0.138            | 0.012                         | 0.032            |
| 246F C1G           | C (T/F)        | 0.056            | 0.189            | 0.040              | 0.109            | 0.039                     | 0.108            | 0.011                         | 0.032            |
| 90045S_A3_4        | A (T/F)        | 0.056            | 0.141            | 0.039              | 0.110            | 0.013                     | 0.049            | 0.002                         | 0.011            |
| 1056_10_TA11_1826  | B (T/F)        | 0.052            | 0.264            | 0.026              | 0.124            | 0.017                     | 0.080            | 0.005                         | 0.027            |
| CNE17              | BC             | 0.052            | 0.228            | 0.023              | 0.117            | 0.012                     | 0.070            | 0.014                         | 0.068            |
| Ce2010_F5          | C (T/F)        | 0.051            | 0.143            | 0.027              | 0.084            | 0.022                     | 0.066            | 0.024                         | 0.074            |
| 928-28             | CRF02_AG       | 0.051            | 0.159            | 0.035              | 0.121            | 0.021                     | 0.077            | 0.015                         | 0.062            |
| 191821_E6_1        | D (T/F)        | 0.049            | 0.184            | 0.035              | 0.101            | 0.032                     | 0.094            | 0.023                         | 0.071            |
| Ce0393_C3          | C (T/F)        | 0.048            | 0.135            | 0.019              | 0.080            | 0.008                     | 0.026            | 0.019                         | 0.058            |
| C2101.c01          | CRF01_AE       | 0.046            | 0.167            | 0.017              | 0.089            | 0.010                     | 0.037            | 0.019                         | 0.064            |
| ZM135M.PL10a       | C              | 0.045            | 0.173            | 0.030              | 0.126            | 0.015                     | 0.060            | 0.009                         | 0.034            |
| Ce2060_G9          | C (T/F)        | 0.038            | 0.138            | 0.025              | 0.075            | 0.016                     | 0.049            | 0.019                         | 0.049            |
| TRO.11             | B              | 0.034            | 0.095            | 0.020              | 0.058            | 0.015                     | 0.045            | 0.004                         | 0.013            |
| 6811.v7.c18        | CD             | 0.034            | 0.101            | 0.016              | 0.052            | 0.009                     | 0.040            | <0.001                        | 0.001            |
| CNE5               | CRF01_AE       | 0.033            | 0.168            | 0.025              | 0.159            | 0.003                     | 0.019            | 0.010                         | 0.058            |
| 6535.3             | B              | 0.032            | 0.143            | 0.008              | 0.060            | 0.007                     | 0.041            | 0.001                         | 0.006            |
| Ce703010054_2A2    | C (T/F)        | 0.031            | 0.087            | 0.022              | 0.055            | 0.005                     | 0.020            | 0.010                         | 0.030            |
| C4118.c09          | CRF01_AE       | 0.031            | 0.111            | 0.008              | 0.038            | <0.001                    | 0.014            | 0.004                         | 0.017            |
| 3016.v5.c45        | D              | 0.030            | 0.088            | 0.019              | 0.049            | 0.015                     | 0.040            | 0.013                         | 0.034            |
| ZM109F.PB4         | C              | 0.029            | 0.124            | 0.012              | 0.058            | 0.006                     | 0.031            | 0.008                         | 0.040            |
| SC422661.8         | B              | 0.026            | 0.075            | 0.011              | 0.040            | 0.007                     | 0.028            | 0.006                         | 0.019            |
| WITO4160.33        | B              | 0.025            | 0.088            | 0.010              | 0.036            | 0.005                     | 0.013            | 0.008                         | 0.028            |
| P1981_C5_3         | G              | 0.025            | 0.082            | 0.012              | 0.050            | 0.004                     | 0.024            | 0.001                         | 0.003            |

|                   |                |        |       |        |        |        |        |        |        |
|-------------------|----------------|--------|-------|--------|--------|--------|--------|--------|--------|
| CAP45.2.00.G3     | C              | 0.024  | 0.103 | 0.014  | 0.060  | 0.003  | 0.009  | 0.015  | 0.069  |
| 6244_13_B5_4576   | B (T/F)        | 0.022  | 0.103 | 0.015  | 0.064  | 0.009  | 0.046  | 0.004  | 0.027  |
| ZM233M.PB6        | C              | 0.021  | 0.075 | 0.009  | 0.039  | 0.003  | 0.016  | 0.003  | 0.019  |
| 1394C9G1(Rev-)    | C (T/F)        | 0.021  | 0.080 | 0.011  | 0.038  | 0.006  | 0.022  | 0.004  | 0.015  |
| CNE8              | CRF01_AE       | 0.021  | 0.106 | 0.013  | 0.074  | 0.004  | 0.047  | 0.003  | 0.036  |
| MS208.A1          | A              | 0.020  | 0.094 | 0.012  | 0.074  | 0.006  | 0.033  | 0.008  | 0.042  |
| T255-34           | CRF02_AG       | 0.020  | 0.140 | 0.006  | 0.051  | 0.002  | 0.021  | 0.001  | 0.017  |
| 6952.v1.c20       | CD             | 0.019  | 0.053 | 0.007  | 0.029  | 0.004  | 0.021  | 0.003  | 0.011  |
| 231966.c02        | D              | 0.017  | 0.076 | 0.013  | 0.042  | 0.006  | 0.028  | 0.009  | 0.030  |
| A07412M1.vrc12    | D              | 0.016  | 0.098 | 0.010  | 0.036  | 0.001  | 0.026  | <0.001 | <0.001 |
| CNE21             | BC             | 0.015  | 0.068 | 0.005  | 0.035  | 0.001  | 0.021  | <0.001 | 0.017  |
| ZM247v1(Rev-)     | C (T/F)        | 0.015  | 0.048 | 0.009  | 0.038  | 0.006  | 0.032  | 0.003  | 0.015  |
| 62357_14_D3_4589  | B (T/F)        | 0.015  | 0.097 | 0.009  | 0.041  | 0.009  | 0.039  | 0.006  | 0.047  |
| 231965.c01        | D              | 0.015  | 0.046 | 0.012  | 0.044  | 0.008  | 0.024  | 0.006  | 0.024  |
| Q23.17            | A              | 0.013  | 0.057 | 0.003  | 0.036  | <0.001 | 0.006  | <0.001 | 0.002  |
| ZM197M.PB7        | C              | 0.012  | 0.056 | 0.008  | 0.032  | 0.001  | 0.012  | 0.004  | 0.018  |
| Ce0682_E4         | C (T/F)        | 0.012  | 0.053 | 0.006  | 0.025  | 0.004  | 0.014  | 0.006  | 0.027  |
| HIV-0013095-2.11  | C              | 0.011  | 0.042 | 0.005  | 0.027  | 0.005  | 0.019  | 0.004  | 0.022  |
| 249M B10          | C (T/F)        | 0.011  | 0.042 | 0.005  | 0.027  | 0.005  | 0.019  | 0.004  | 0.022  |
| X1193_c1          | G              | 0.010  | 0.064 | 0.002  | 0.022  | <0.001 | 0.009  | 0.001  | 0.011  |
| 6480.v4.c25       | CD             | 0.010  | 0.033 | 0.005  | 0.018  | 0.002  | 0.009  | 0.003  | 0.017  |
| PVO.4             | B              | 0.009  | 0.066 | 0.007  | 0.035  | 0.006  | 0.031  | 0.004  | 0.017  |
| C3347.c11         | CRF01_AE       | 0.009  | 0.053 | 0.005  | 0.033  | 0.001  | 0.015  | 0.001  | 0.014  |
| P0402_c2_11       | G              | 0.009  | 0.050 | 0.003  | 0.021  | 0.001  | 0.010  | 0.001  | 0.005  |
| RHPA4259.7        | B              | 0.008  | 0.033 | 0.002  | 0.015  | 0.001  | 0.007  | <0.001 | 0.008  |
| REJO4541.67       | B              | 0.008  | 0.029 | 0.003  | 0.013  | 0.003  | 0.010  | 0.005  | 0.017  |
| TRJO4551.58       | B              | 0.008  | 0.028 | 0.004  | 0.018  | 0.005  | 0.016  | 0.003  | 0.012  |
| CNE20             | BC             | 0.007  | 0.031 | 0.006  | 0.021  | 0.002  | 0.011  | <0.001 | 0.002  |
| CNE58             | BC             | 0.007  | 0.045 | 0.005  | 0.034  | 0.002  | 0.018  | <0.001 | 0.017  |
| R2184.c04         | CRF01_AE       | 0.007  | 0.038 | 0.003  | 0.023  | 0.002  | 0.015  | 0.002  | 0.017  |
| Du156.12          | C              | 0.006  | 0.026 | 0.002  | 0.010  | <0.001 | 0.006  | <0.001 | 0.004  |
| 1006_11_C3_1601   | B (T/F)        | 0.005  | 0.020 | 0.002  | 0.011  | 0.001  | 0.006  | <0.001 | 0.001  |
| 1012_11_TC21_3257 | B (T/F)        | 0.005  | 0.021 | <0.001 | 0.008  | <0.001 | 0.006  | <0.001 | 0.004  |
| ZM249M.PL1        | C              | 0.005  | 0.021 | 0.003  | 0.014  | <0.001 | 0.006  | <0.001 | 0.005  |
| X1254_c3          | G              | 0.005  | 0.027 | 0.002  | 0.013  | <0.001 | 0.007  | <0.001 | 0.005  |
| HIV-16055-2.3     | C              | 0.004  | 0.020 | 0.001  | 0.011  | <0.001 | 0.005  | 0.001  | 0.010  |
| 191084 B7-19      | A (T/F)        | 0.004  | 0.019 | 0.002  | 0.014  | <0.001 | 0.007  | <0.001 | 0.005  |
| 0815.v3.c3        | ACD            | 0.004  | 0.016 | 0.002  | 0.009  | 0.001  | 0.006  | 0.001  | 0.008  |
| 3415.v1.c1        | A              | 0.003  | 0.031 | 0.001  | 0.020  | <0.001 | 0.008  | <0.001 | 0.003  |
| 191955_A11        | A (T/F)        | 0.003  | 0.019 | 0.005  | 0.034  | 0.006  | 0.033  | 0.024  | 0.115  |
| 3301.v1.c24       | AC             | 0.003  | 0.014 | <0.001 | 0.010  | <0.001 | 0.004  | <0.001 | 0.002  |
| Ce1086_B2         | C (T/F)        | 0.002  | 0.011 | 0.001  | 0.007  | <0.001 | 0.005  | 0.001  | 0.004  |
| 3365.v2.c2        | A              | 0.002  | 0.025 | <0.001 | 0.010  | <0.001 | 0.004  | <0.001 | 0.001  |
| 6041.v3.c23       | AC             | 0.002  | 0.009 | <0.001 | 0.006  | <0.001 | 0.005  | <0.001 | 0.004  |
| Q769.d22          | A              | 0.001  | 0.012 | <0.001 | 0.004  | <0.001 | 0.003  | <0.001 | 0.005  |
| BJOX028000.10.3   | CRF01_AE (T/F) | 0.001  | 0.009 | <0.001 | 0.007  | <0.001 | 0.003  | <0.001 | 0.004  |
| X1632_S2_B10      | G              | 0.001  | 0.011 | <0.001 | 0.004  | <0.001 | 0.002  | <0.001 | 0.004  |
| WEAU_d15_410_787  | B (T/F)        | <0.001 | 0.012 | <0.001 | 0.005  | <0.001 | 0.003  | <0.001 | 0.003  |
| HIV-001428-2.42   | C              | <0.001 | 0.004 | <0.001 | <0.001 | <0.001 | <0.001 | <0.001 | <0.001 |
| BF1266.431a       | C (T/F)        | <0.001 | 0.018 | <0.001 | 0.011  | <0.001 | 0.007  | <0.001 | 0.006  |
| CNE19             | BC             | <0.001 | 0.027 | <0.001 | 0.017  | <0.001 | 0.009  | <0.001 | 0.005  |
| CNE52             | BC             | <0.001 | 0.020 | <0.001 | 0.018  | <0.001 | 0.007  | <0.001 | 0.005  |
| CNE53             | BC             | <0.001 | 0.009 | <0.001 | 0.008  | <0.001 | 0.004  | <0.001 | 0.004  |
| Q259.d2.17        | A              | <0.001 | 0.005 | <0.001 | 0.001  | <0.001 | 0.001  | <0.001 | 0.002  |
| Q842.d12          | A              | <0.001 | 0.010 | <0.001 | 0.004  | <0.001 | 0.002  | <0.001 | 0.003  |
| 263-8             | CRF02_AG       | <0.001 | 0.054 | <0.001 | 0.029  | <0.001 | 0.016  | <0.001 | 0.007  |
| 235-47            | CRF02_AG       | <0.001 | 0.014 | <0.001 | 0.009  | <0.001 | 0.005  | <0.001 | 0.002  |

|                                                         |     |       |      |       |          |       |
|---------------------------------------------------------|-----|-------|------|-------|----------|-------|
| IC <sub>50</sub> and IC <sub>80</sub><br>values (µg/ml) | >50 | 10-50 | 1-10 | 0.1-1 | 0.01-0.1 | <0.01 |
|---------------------------------------------------------|-----|-------|------|-------|----------|-------|
